# Supplementary material for: Heterostructured Co3O4/PEI–CNTs composite: fabrication, characterization and CO gas sensors at room temperature
Source: Royal Society of Chemistry journal article supplement (doi:10.1039/c3ta15019d), 2014-01-01
Supplement: c3ta15019d.pdf [file c3ta15019d.pdf]

# Heterostructured $\text{Co}_3\text{O}_4/\text{PEI-CNTs}$ Composite: Fabrication, Characterization and CO Gas Sensors at Room Temperature

Lifang Dang<sup>a</sup>, Guo Zhang<sup>a</sup>, Kan Kan<sup>a,c</sup>, Yufei Lin<sup>a</sup>, Fuquan Bai<sup>d</sup>, Liqiang jing<sup>a</sup>, Peikang Shen<sup>e</sup>, Li Li<sup>\*a,b</sup> and Keying Shi <sup>\*a</sup>

<sup>a</sup> Key Laboratory of Functional Inorganic Material Chemistry, Ministry of Education. Key Laboratory of Physical Chemistry, School of Chemistry and Material Science, Heilongjiang University, Harbin, 150080, P. R. China

<sup>b</sup> Key Laboratory of Chemical Engineering Process & Technology for High-efficiency Conversion, School of Chemistry and Material Science, Heilongjiang University, Harbin 150080, P. R. China

<sup>c</sup> Daqing Branch, Heilongjiang Academy of Sciences, Daqing 163319, P. R. China.

<sup>d</sup> State Key Laboratory of Theoretical and Computational Chemistry, Institute of Theoretical Chemistry, Jilin University, Changchun 130023, China.

<sup>e</sup> Department of Physics and Engineering Sun Yat-sen University Guangzhou, 510275, P. R. China

E-mail: shikeying2008@163.com; llwj@sohu.com; Fax: +86 4518667 3647; Tel: +86 451 8660 9141

**Table S1 TG results of synthesized samples under air**

| Samples | (After 540 or 910 °C under air)     |
|---------|-------------------------------------|
|         | $\Delta W \text{ Co}_3\text{O}_4\%$ |
| C-1     | 6.98                                |
| C-3     | 21.84                               |
| C-5     | 45.1                                |
| C-7     | 32.5                                |

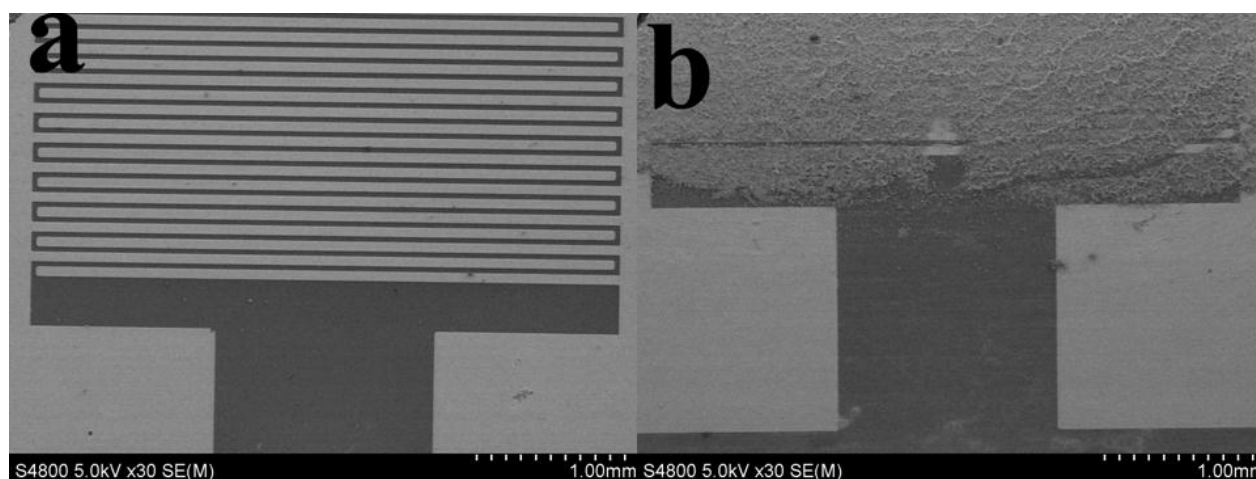

Fig. S1 (a) SEM image of the part of Au electrodes, (b) SEM images of the part of sensor

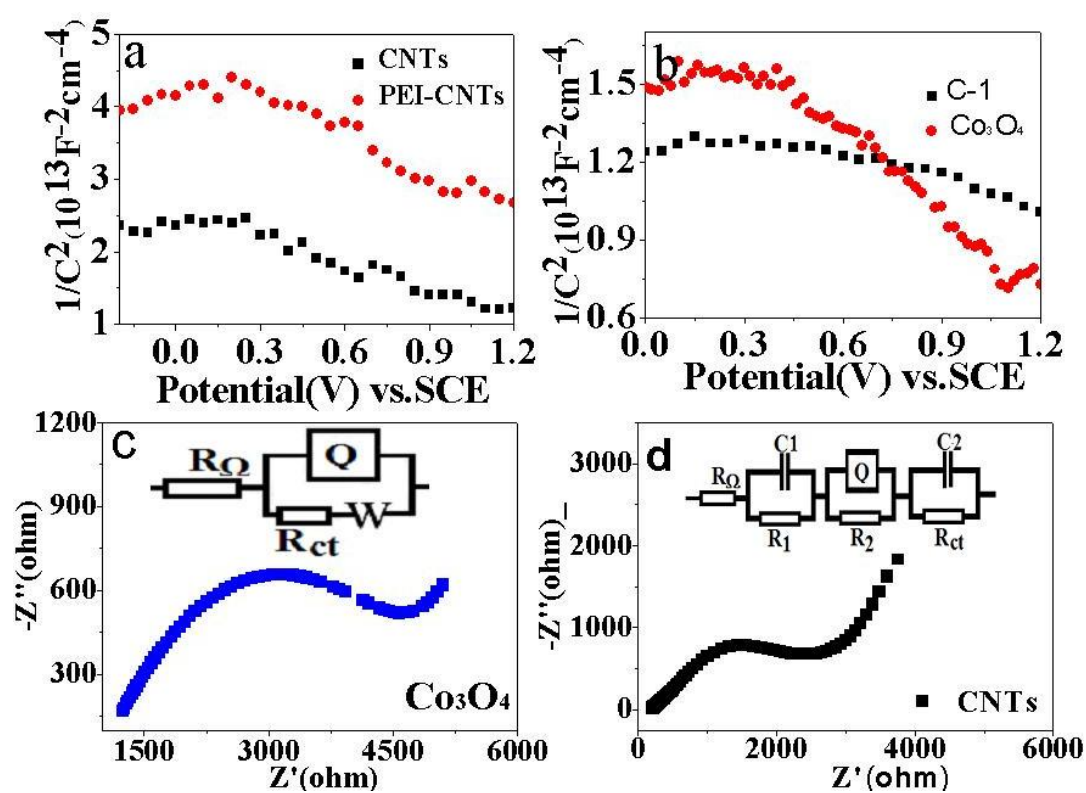

Fig. S2 Mot-Schottky plots of samples electrodes measured in 3 M KOH solution with a frequency of 12 kHz (a) CNTs and PEI-CNTs, (b)  $\text{Co}_3\text{O}_4$  NPs and C-1, (c) Nyquist plots of  $\text{Co}_3\text{O}_4$  NPs and equivalent circuit model of samples (inset) measured in the frequency range from 0.01Hz to 100 kHz with 0.4V, (d) Nyquist plots of CNTs

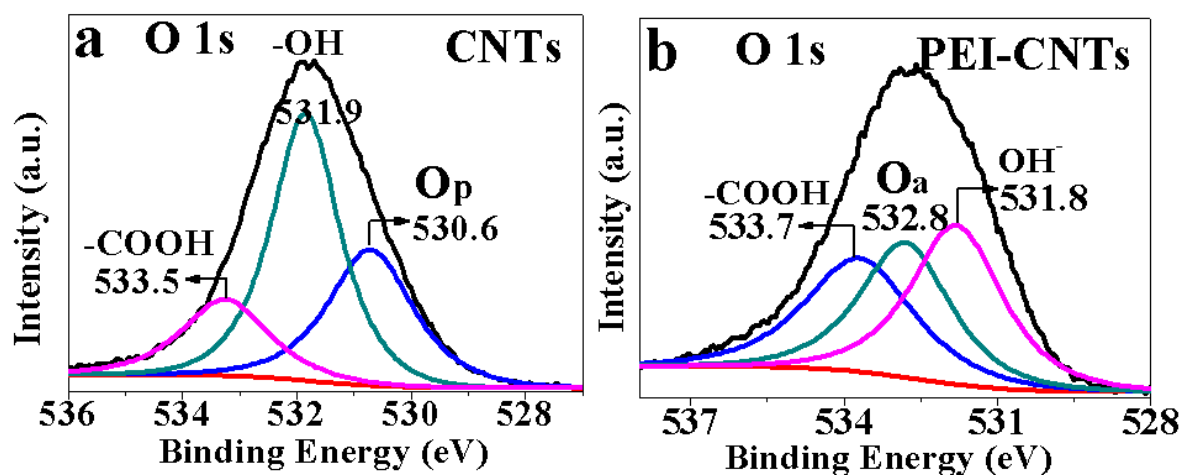

Fig.S3 XPS spectra of the O1s of (a) CNTs, (b), PEI-CNTs.

Fig.S3 shows the XPS spectra of O1s CNTs and PEI-CNTs. The O1s spectra of samples are shown in Fig.S3 (a, b). The O1s peak confirmed the presence of some carboxylic and hydroxyl functions onto the CNTs and PEI-CNTs surface at  $533.5 \pm 0.2$  eV and  $531.9 \pm 0.1$  eV, respectively. Furthermore, physically adsorbed oxygen/carbonates were detected at 530.6 eV (O<sub>p</sub>) on the CNTs<sup>1</sup>. The peak at 532.8 eV on the PEI-CNTs are due to chemisorbed oxygen<sup>1</sup>.

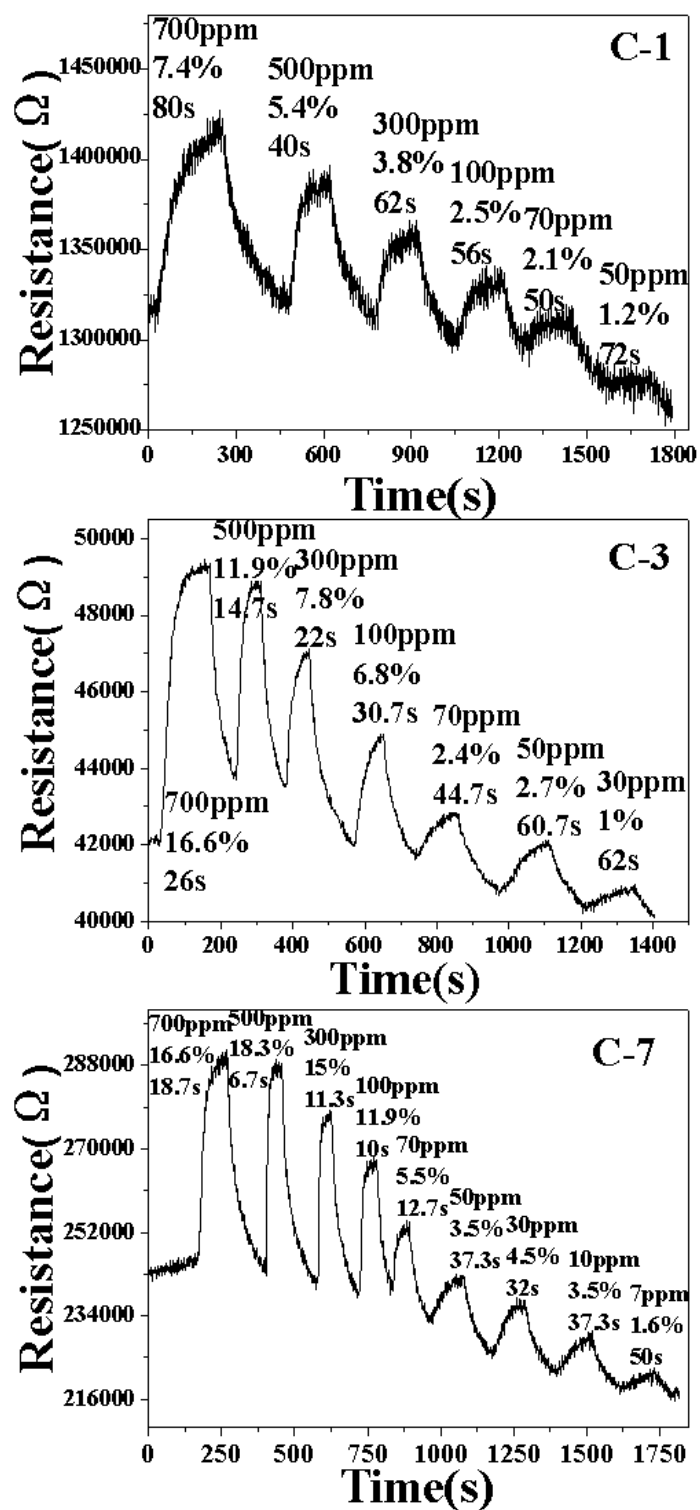

**Fig.S4** Dynamic response-recovery curves of  $\text{Co}_3\text{O}_4/\text{PEI-CNTs}$  composites thin film sensors with different the hydrothermal time to 5-7000 ppm CO at room temperature (RT) in air. (a) C-1, (b) C-3, (c) C-7 (RH: 26%)

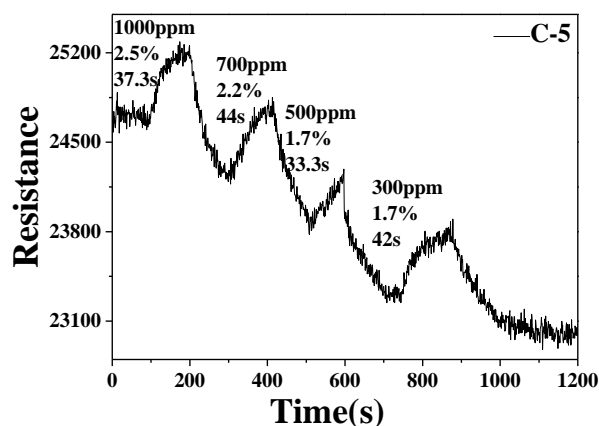

Fig.S5 Dynamic response-recovery curves of C-5 thin film sensor to CO at RT in pure nitrogen.

Table S2 The response-recovery results of C-5 sensor to CO

| Volume<br>Concentration | 1000<br>ppm | 700<br>ppm | 500<br>ppm | 300<br>ppm | 70<br>ppm | 50<br>ppm | 30<br>ppm | 10<br>ppm | 5<br>ppm |
|-------------------------|-------------|------------|------------|------------|-----------|-----------|-----------|-----------|----------|
| Sensitivity (%)         | 30.3        | 27.4       | 24.8       | 23         | 12.7      | 8.6       | 7.7       | 5.1       | 3.2      |
| Response time (s)       | 8           | 8          | 4.7        | 4.7        | 11.3      | 16.7      | 16.7      | 33.3      | 43.3     |
| Recovery time (s)       | 30          | 26         | 26.3       | 28         | 28.6      | 31.3      | 36.7      | 45        | 48       |

The recovery time of C-5 sensor was defined according to the references<sup>2, 3</sup>.

## References

1. V. Datsyuk, M. Kalyva, K. Papagelis, J. Parthenios, D. Tasis, A. Siokou, I. Kallitsis and C. Galiotis, *Carbon*, 2008, 46, 833-840.
2. C.-S. Chu and Y.-L. Lo, *Sensors and Actuators B: Chemical*, 2007, 124, 376-382.
3. L. Li, P. Gao, M. Baumgarten, K. Müllen, N. Lu, H. Fuchs and L. Chi, *Advanced Materials*, 2013.
